# Supplementary material
Source: ML conference proceedings conference paper supplement (https://proceedings.mlr.press/v80/reagan18a.html)
Supplement: Supplementary file 1 [file reagan18a-supp.pdf]

## Supplemental material

Table 1: **Compression without sparse encoding.** Simplified weights without sparse encoding (CSR and Bloomier encoding) can be compressed for transmission. This table presents compression results for all models considered using only Huffman and arithmetic coding on the pruned and clustered weights.

| Model         | Pruning Method | Layer | Compression Factor (Size KB) |         |            |        |
|---------------|----------------|-------|------------------------------|---------|------------|--------|
|               |                |       | Huffman                      |         | Arithmetic |        |
| LeNet-300-100 | Magnitude      | FC-0  | 28.6×                        | (32.2)  | 44.8×      | (20.5) |
|               |                | FC-1  | 28.5×                        | (4.1)   | 40.0×      | (2.9)  |
|               | DNS            | FC-0  | 30.8×                        | (30.0)  | 97.7×      | (9.4)  |
|               |                | FC-1  | 30.6×                        | (3.8)   | 91.0×      | (1.3)  |
| LeNet5        | Magnitude      | CNN-1 | 26.7×                        | (1.4)   | 30.6×      | (1.2)  |
|               |                | FC-0  | 27.6×                        | (78.7)  | 36.3×      | (59.8) |
|               | DNS            | CNN-1 | 29.6×                        | (3.3)   | 61.3×      | (1.6)  |
|               |                | FC-0  | 31.4×                        | (49.9)  | 186×       | (8.4)  |
| VGG-16        | Magnitude      | FC-0  | 20.5×                        | (19100) | 79.2×      | (4950) |
|               |                | FC-1  | 20.1×                        | (3180)  | 62.4×      | (1027) |

Table 2: **Network compression with CSR encoding.** In the original Deep Compression paper, CSR encoded weights were compressed with Huffman coding. Below are results from applying both Huffman and arithmetic coding to CSR encoded weights for all models considered. This was done to show the relative benefits of different compression techniques independent of the CSR encoding scheme.

| Model         | Pruning Method | Layer | Compression Factor (Size KB) |        |         |        |            |        |
|---------------|----------------|-------|------------------------------|--------|---------|--------|------------|--------|
|               |                |       | CSR                          |        | Huffman |        | Arithmetic |        |
| LeNet-300-100 | Magnitude      | FC-0  | 40.2×                        | (22.9) | 59.0×   | (15.6) | 73.6×      | (12.5) |
|               |                | FC-1  | 46.8×                        | (2.5)  | 59.0×   | (15.6) | 53.2×      | (2.2)  |
|               | DNS            | FC-0  | 112×                         | (8.2)  | 153×    | (6.0)  | 156×       | (5.9)  |
|               |                | FC-1  | 99.2×                        | (1.2)  | 129×    | (0.9)  | 138×       | (0.85) |
| LeNet5        | Magnitude      | CNN-1 | 40.4×                        | (0.9)  | 42.9×   | (0.8)  | 34.3×      | (1.1)  |
|               |                | FC-0  | 46.6×                        | (46.6) | 55.7×   | (39)   | 57.1×      | (38)   |
|               | DNS            | CNN-1 | 90.0×                        | (1.2)  | 90.0×   | (1.1)  | 89.1×      | (1.1)  |
|               |                | FC-0  | 224×                         | (7.0)  | 333×    | (4.7)  | 347×       | (4.5)  |
| VGG-16        | Magnitude      | FC-0  | 81.8×                        | (4790) | 119×    | (3280) | 112×       | (3502) |
|               |                | FC-1  | 71.2×                        | (900)  | 89.0×   | (720)  | 83.5×      | (767)  |

Table 3: **Network compression with Bloomier filter encoding.** In Weightless, Bloomier encoded weights were compressed with arithmetic coding. Below are results of applying both Huffman and arithmetic coding to Bloomier encoded weights for all models considered. This was done to show the relative benefits of different compression techniques independent of the Bloomier encoding scheme.

| Model         | Pruning Method | Layer | Compression Factor (Size KB) |              |              |
|---------------|----------------|-------|------------------------------|--------------|--------------|
|               |                |       | Bloomier                     | Huffman      | Arithmetic   |
| LeNet-300-100 | Magnitude      | FC-0  | 45.8× (20.1)                 | 50.3× (18.3) | 60.1× (15.3) |
|               |                | FC-1  | 56.0× (2.09)                 | 40.3× (2.9)  | 64.3× (1.82) |
|               | DNS            | FC-0  | 152× (6.04)                  | 145× (6.3)   | 174× (5.27)  |
|               |                | FC-1  | 174× (0.67)                  | 125× (0.9)   | 195× (0.60)  |
| LeNet5        | Magnitude      | CNN-1 | 46.2× (0.8)                  | 31.4× (1.1)  | 51.6× (0.70) |
|               |                | FC-0  | 62.8× (34.6)                 | 78.4× (27.9) | 74.2× (31.1) |
|               | DNS            | CNN-1 | 98× (1.2)                    | 73.7× (1.3)  | 114× (0.86)  |
|               |                | FC-0  | 445× (3.52)                  | 427× (3.7)   | 496× (3.16)  |
| VGG-16        | Magnitude      | FC-0  | 142× (2750)                  | 155× (2530)  | 157× (2500)  |
|               |                | FC-1  | 74.6× (860)                  | 82.8× (774)  | 85.8× (740)  |

Table 4: **Weight reconstruction runtimes.** Included in this table are the runtimes for Bloomier weight reconstruction using an Intel i7-6700K desktop CPU and a ARM A53 (600MHz clock) mobile class CPU. All numbers reported use only a single core.

| Model         | Pruning Method | Layer | Runtime (Seconds) |        |
|---------------|----------------|-------|-------------------|--------|
|               |                |       | Desktop           | Mobile |
| LeNet-300-100 | Magnitude      | FC-0  | 0.52              | 7.1    |
|               |                | FC-1  | 0.066             | 0.9    |
|               | DNS            | FC-0  | 0.52              | 7.0    |
|               |                | FC-1  | 0.067             | 0.91   |
| LeNet5        | Magnitude      | CNN-1 | 0.02              | 0.28   |
|               |                | FC-0  | 1.3               | 17.9   |
|               | DNS            | CNN-1 | 0.055             | 0.76   |
|               |                | FC-0  | 0.89              | 12.1   |
| VGG-16        | Magnitude      | FC-0  | 22.8              | 296    |
|               |                | FC-1  | 3.72              | 51.9   |
